# Supplementary material for: Egyptian Fruit Bats (Rousettus aegyptiacus) Were Resistant to Experimental Inoculation with Avian-Origin Influenza A Virus of Subtype H9N2, But Are Susceptible to Experimental Infection with Bat-Borne H9N2 Virus
Source: MDPI journal article supplement (doi:10.3390/v13040672), 2021-04-14
Supplement: s1 [file s1]

## Supplementary Data

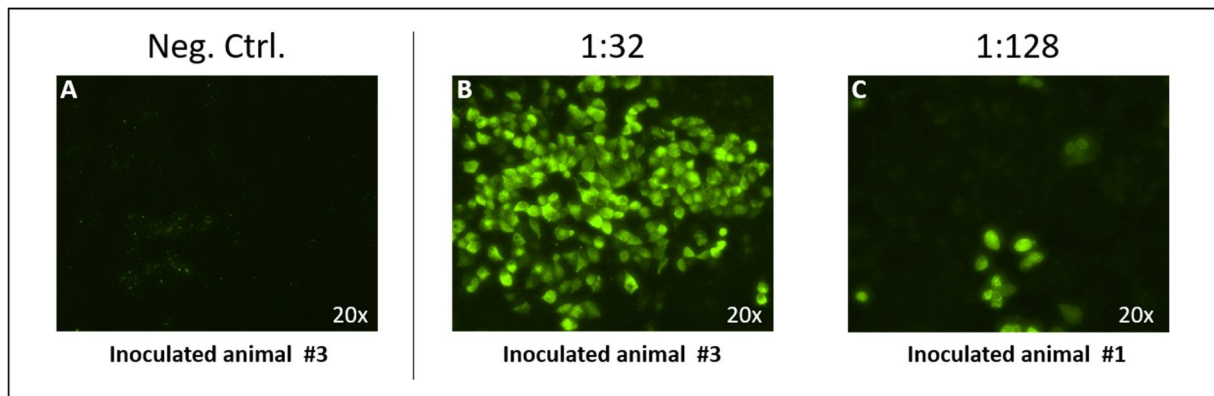

**Supplementary Figure S1:** Immunofluorescence assay of animal sera showing sero-reactivity after infection of Egyptian fruit bats with A/bat/Egypt/381OP/2017 (H9N2). Cells were seeded in a 96-well plate and grown for 24 hours. Afterwards, cells were infected with A/bat/Egypt/381OP/2017 (H9N2) for 24 hours, followed by fixation with 4% paraformaldehyde (PFA) and permeabilization with 0.5% Triton-X-100 in PBS. Finally, cells were incubated for 1 h with the respective animal sera in a dilution series of 1:10 – 1:256, as well as with a negative serum sample of each respective animal taken before start of the experiment. Pictures were taken at a 20x magnification **A** Fixed and permeabilized infected cells were incubated for 1 h with negative serum of the respective animal taken before start of the experiment. **B** Fixed and permeabilized infected cells were incubated for 1 h with a 1:32 dilution of serum taken from the respective inoculated animal #3 at 21 dpi **C** Fixed and permeabilized infected cells were incubated for 1 h with a 1:128 dilution of serum taken from the respective inoculated animal #1 at 21 dpi.

**Supplementary Table S1:** S/P-values of the NP-ELISA with sera collected from animals that were infected with A/bat/Egypt/381OP/2017 (H9N2)

|                      | S/P-value d0 | S/P-value d7 | S/P-value d21 |
|----------------------|--------------|--------------|---------------|
| Contact animal #1    | 106,4039871  |              | 105,6568482   |
| Contact animal #2    | 106,8042283  |              | 99,92884341   |
| Contact animal #3    | 103,9224447  |              | 101,1295883   |
| Contact animal #4    | 104,9719806  |              | 99,17281922   |
| Contact animal #5    | 110,0951702  | 101,2630056  |               |
| Contact animal #6    | 109,9261799  | 98,55021231  |               |
| Inoculated animal #1 | 105,8169531  |              | 21,02641578   |
| Inoculated animal #2 | 105,3633365  |              | 45,21924945   |
| Inoculated animal #3 | 107,7292534  |              | 13,25269088   |
| Inoculated animal #4 | 107,4268458  |              | 53,20644148   |
| Inoculated animal #5 | 107,1422194  | 70,62172262  |               |
| Inoculated animal #6 | 108,6631637  | 82,27341541  |               |

≤45% positive; 45% - 50% questionable; ≥50% negative
